# Supplementary material for: Menopausal Status Contributes to Overall Survival in Endometrial Cancer Patients
Source: Cancers (Basel). 2023 Jan 10;15(2):451. doi: 10.3390/cancers15020451 (PMC9856958; doi:10.3390/cancers15020451)
Supplement: Supplementary file 1 [file cancers-15-00451-s001.zip › cancers-1989741-supplementary.pdf]

# **Supplementary materials**

## **Menopausal status contributes to overall survival in endometrial cancer patients**

**Bartłomiej Barczyński<sup>1,\*</sup>, Karolina Frąszczak<sup>1</sup>, Artur Wnorowski<sup>2</sup>, Jan Kotarski<sup>3</sup>**

<sup>1</sup> 1st Chair and Department of Oncological Gynaecology and Gynaecology, Medical University in Lublin, Poland

<sup>2</sup> Department of Biopharmacy, Medical University in Lublin, Poland

<sup>3</sup> Independent Laboratory of Cancer Diagnostics and Immunology, Medical University in Lublin, Poland

\* Correspondence: [bbarczynski@poczta.onet.pl](mailto:bbarczynski@poczta.onet.pl); Tel.: +48504108558

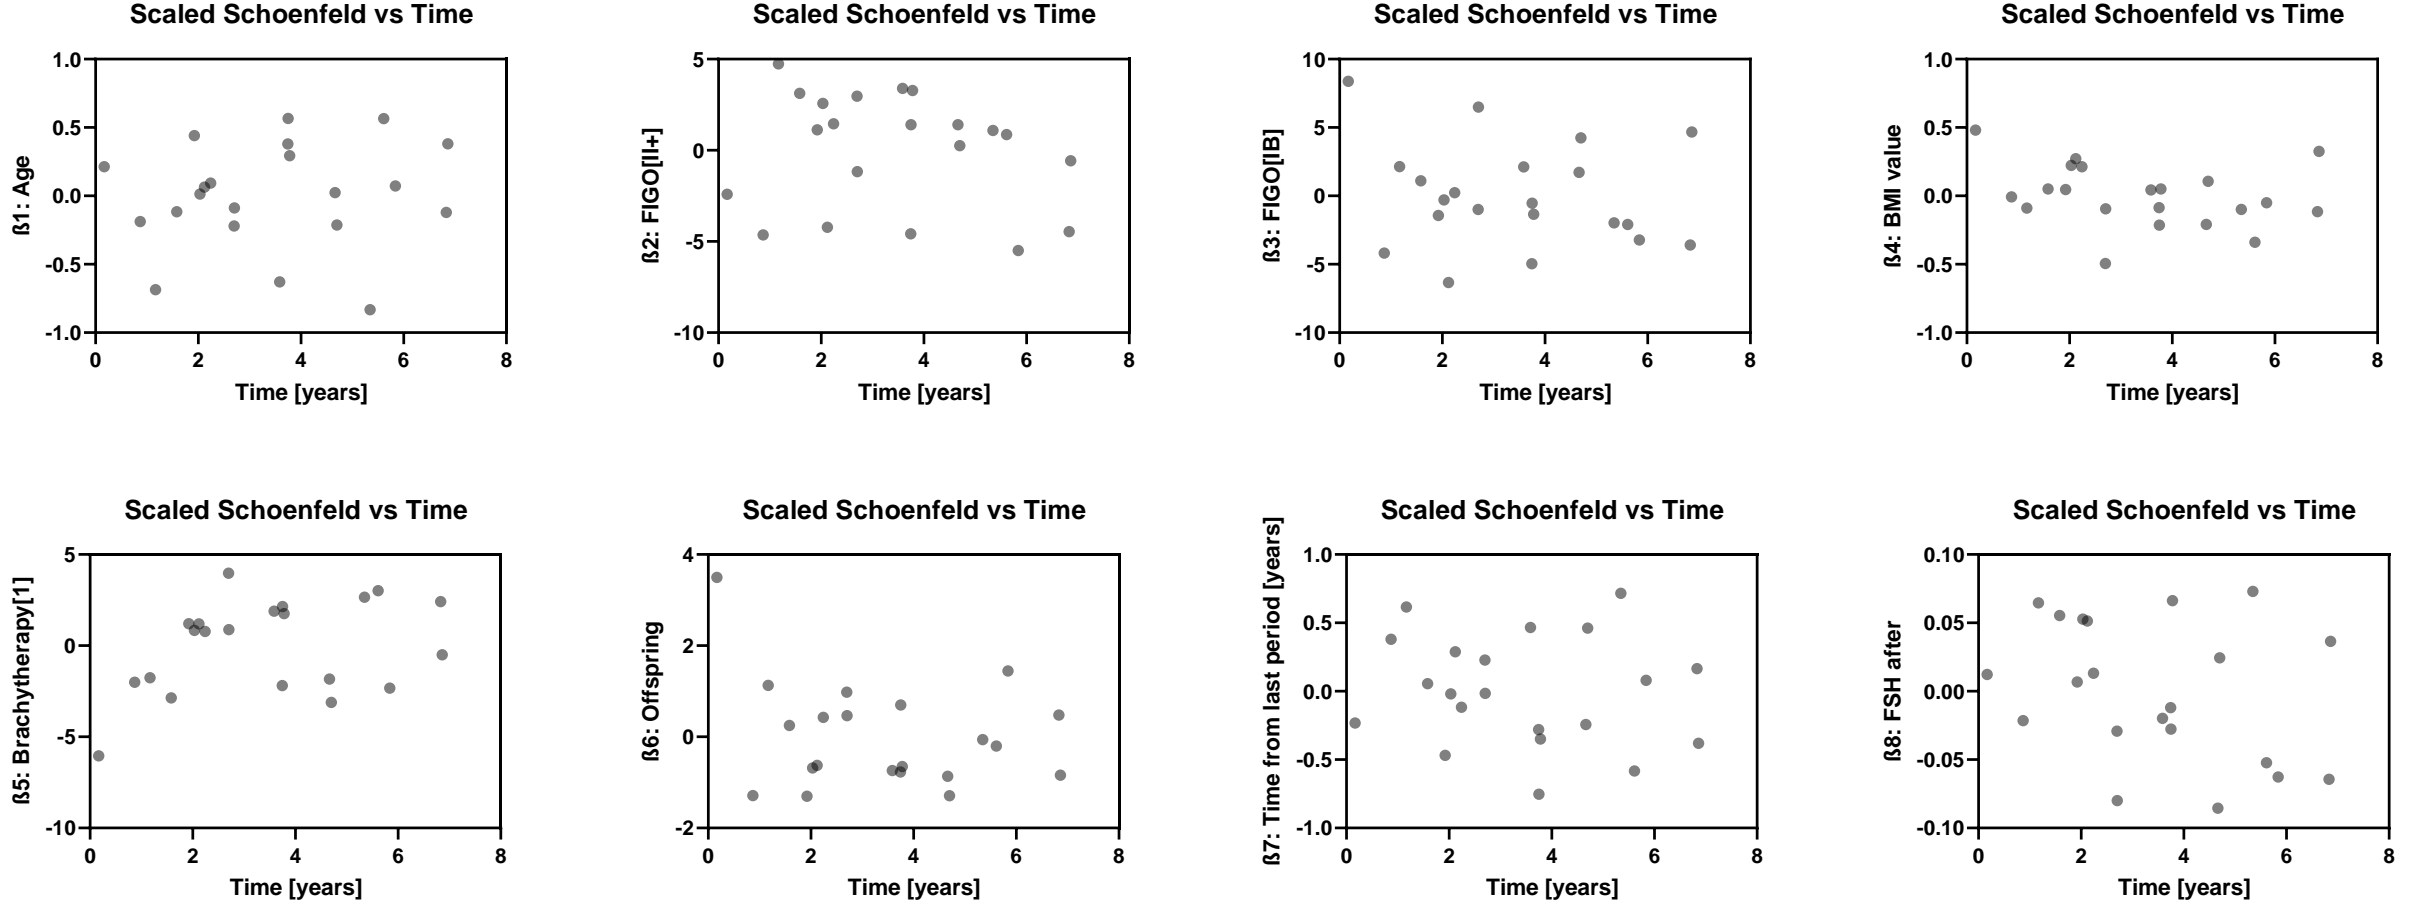

**Figure S1.** Scaled Schoenfeld residuals plotted against time.

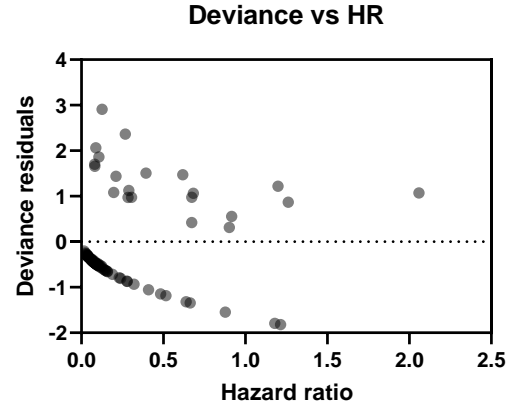

**Figure S2.** Deviance residuals plotted against hazard ratio. The large dense cluster of points in the lower left region of the graph is due to a high proportion of censored observations in the data set. By definition, censored observations must have negative deviance residuals.

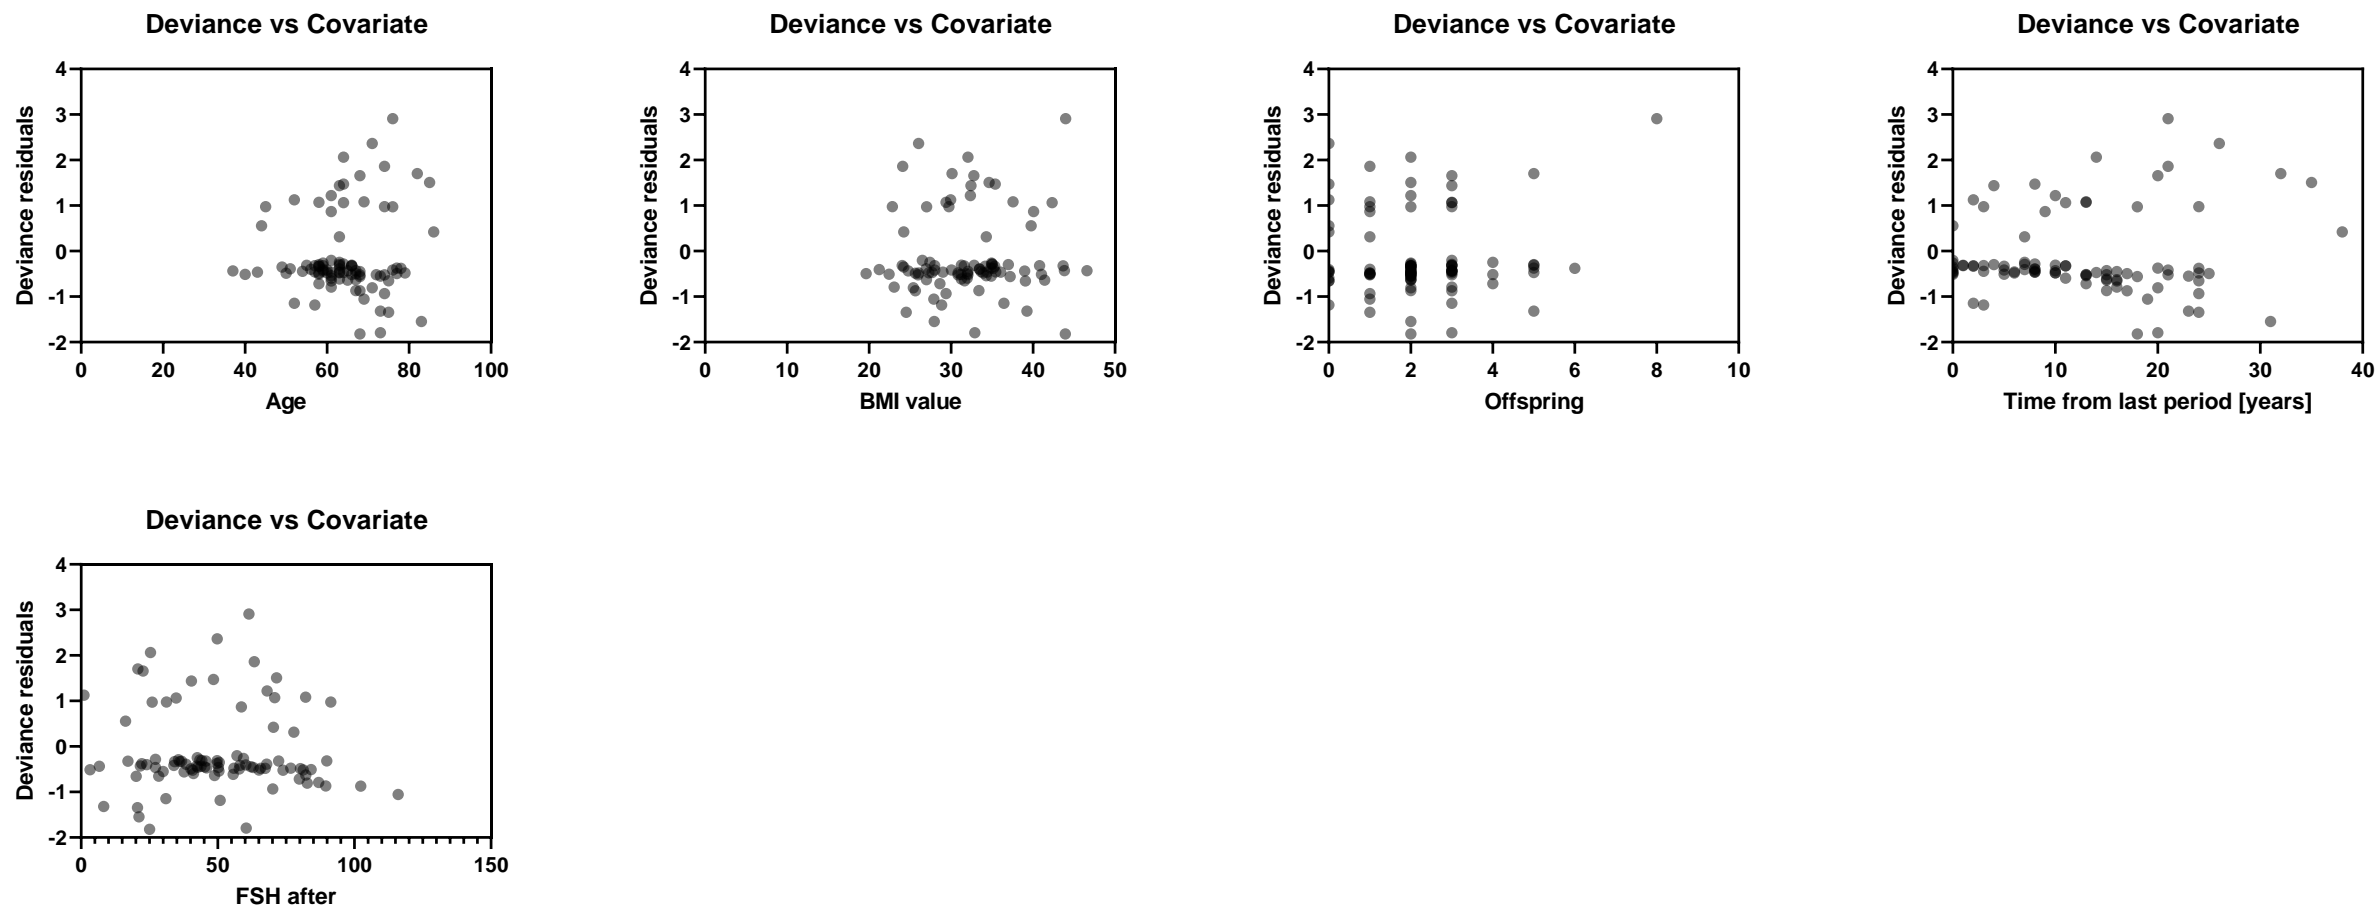

**Figure S3.** Deviance residuals plotted against hazard ratio. The large dense cluster of points in the lower left region of the graph is due to a high proportion of censored observations in the data set. By definition, censored observations must have negative deviance residuals.
